# Supplementary material for: Genetic deletion of Polo-like kinase 2 reduces alpha-synuclein serine-129 phosphorylation in presynaptic terminals but not Lewy bodies
Source: PubMed Central journal article supplement (PMC7948797; doi:10.1016/j.jbc.2021.100273), 2021-01-09

## *Supplementary information*

### **Supplementary Figure 1. Polo-like kinase 2 genetic deletion does not alter many behavioral**

**measures.** (A) Open field measure of anxiety (% time spent in the center of the field) are not significantly different between WT and Syn-GFP animals on a PLK2 WT (+/+), Het. (+/-), or KO (-/-) background (repeated measures ANOVA: Syn-GFP  $p=0.667$ , PLK2  $p=0.843$ ). (B) Novel object exploration measure (% time exploring) showed significant differences between novel and familiar object, but not between WT and Syn-GFP or different (WT, Het., KO) PLK2 background groups (two-way ANOVA: object  $p<0.0001$ , group  $p=0.999$ ; post-hoc Sidak's tests: WT  $p=0.0007$ , PLK2 Het./WT  $p=0.0007$ , WT/Syn-GFP  $p=0.0001$ , PLK2 Het./Syn-GFP  $p=0.9836$ , PLK2 KO/Syn-GFP  $p=0.0294$ ). (C) Rotarod measure (latency to fall) showed no significant differences between WT and Syn-GFP animals on the different PLK2 backgrounds (repeated measures ANOVA: Syn-GFP  $p=0.351$ , PLK2  $p=0.399$ ). (D) Morris Water Maze test of spatial platform memory at 24hr measure (% time in quadrants) showed no significant differences between WT and Syn-GFP animals on PLK2 WT and KO backgrounds, although animals on the PLK2 Het. background showed reduced spatial memory (two-way ANOVA: \*\*  $p<0.01$ , \*\*\*\*  $p<0.0001$ ). (E) Fear conditioning with spatial contextual cues measure (% time freezing) showed no significant differences between WT and Syn-GFP animals but did show a significant effect of PLK2 genotype (repeated measures ANOVA: Syn-GFP  $p=0.682$ , PLK2  $p=0.033$ ; post-hoc Sidak's tests: PLK2 KO vs. Het.  $p=0.035$ ). (F) Fear conditioning with tone cues measure (% time freezing) showed no significant differences between WT and Syn-GFP animals on the different PLK2 backgrounds (repeated measures ANOVA: Syn-GFP  $p=0.318$ , PLK2  $p=0.455$ ).

### **Supplementary Figure 2. *In vivo* formation of Lewy inclusion and measures of inclusion**

**aggregation.** (A) Top: *In vivo* multiphoton imaging from cortex in a Syn-GFP (PLK2 WT) mouse after PFF injection showed growth of individual somatic Lewy inclusion over the course of 15 days. Image inverted so that high Syn-GFP signal shown as black in the interest of clarity. Scale bar 10  $\mu\text{m}$ . Middle & Bottom: Same inclusion shown at a lower Z-planes, each 2  $\mu\text{m}$  apart in the Z-axis. (B) Top: *In vivo* multiphoton image of Syn-GFP mouse cortex with a somatic inclusion studied by FRAP in order to measure aggregation. Region undergoing FRAP

(rectangle) shown before (yellow), immediately after (red) and for 5 minutes after bleach pulse (yellow). Bottom: Group data showed no difference in somatic Lewy inclusion aggregation state as measured *in vivo* by FRAP immobile fraction at 5 minutes in PLK2 WT and KO animals (WT=1.00±0.03, KO=0.99±0.01, unpaired t-test, two-tailed p=0.7617).

**Supplementary Figure 3. Frequency of *in vivo* multiphoton imaging in Syn-GFP mice does not alter rate of Lewy inclusion-bearing neuron cell death.** Group data showing that Syn-GFP inclusion-bearing neurons died at similar rates regardless of whether they were imaged infrequently (3 times) or frequently (17 times) over a ~160 day period, suggesting that cell death is not due to phototoxicity from chronic *in vivo* imaging.

**A**

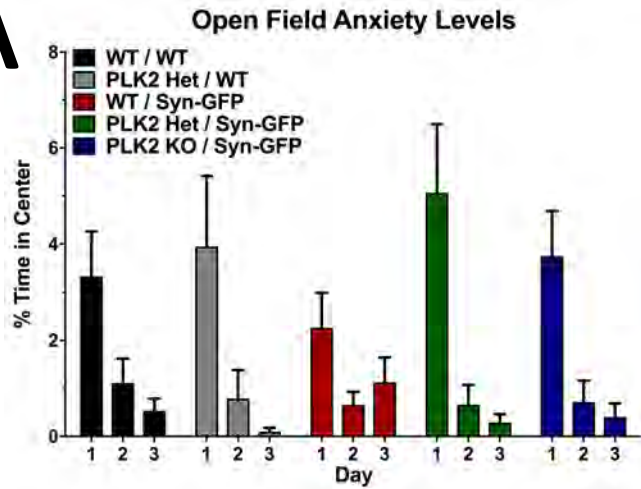

**B**

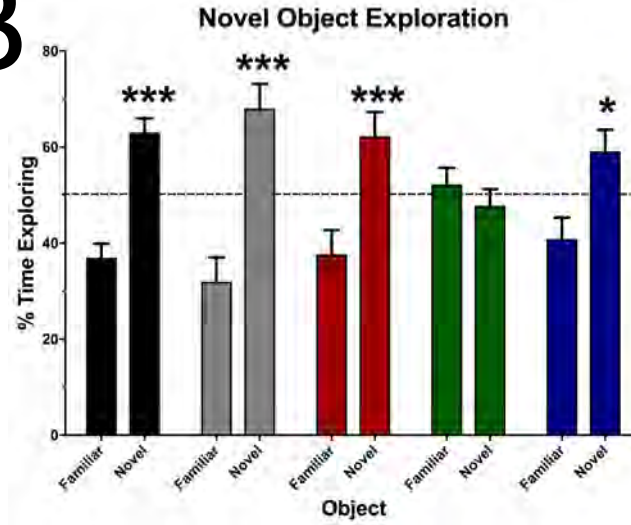

**C**

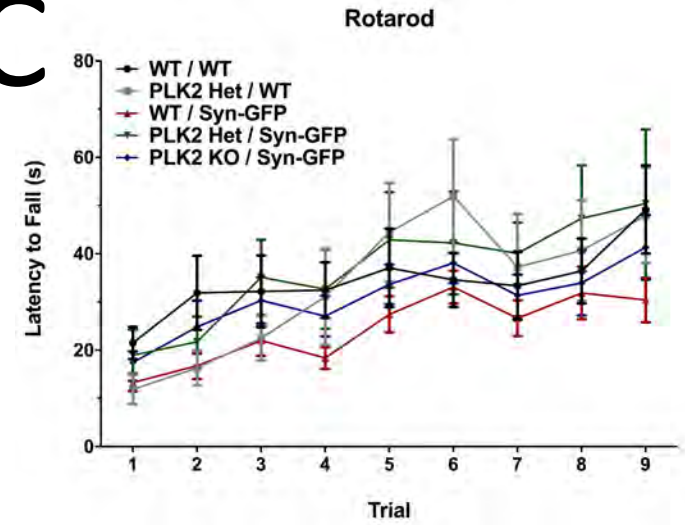

**D**

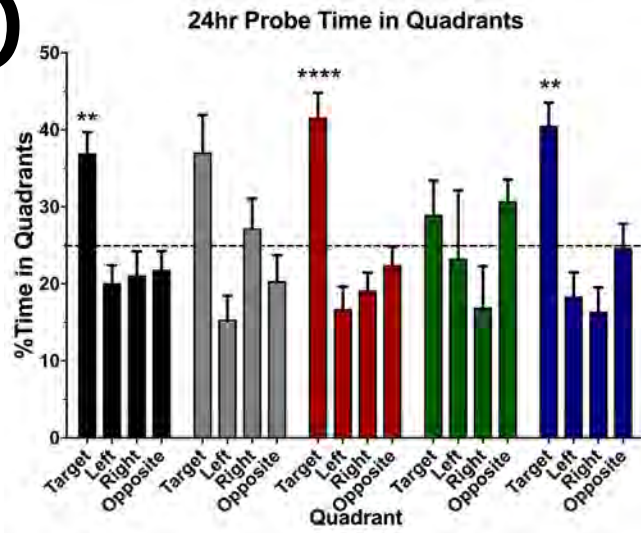

**E**

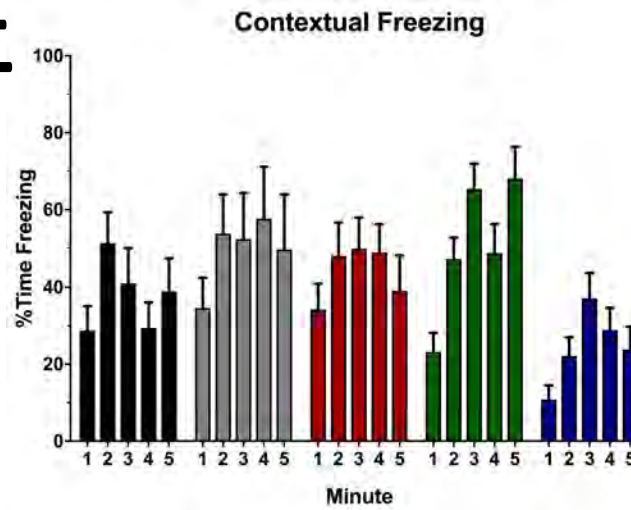

**F**

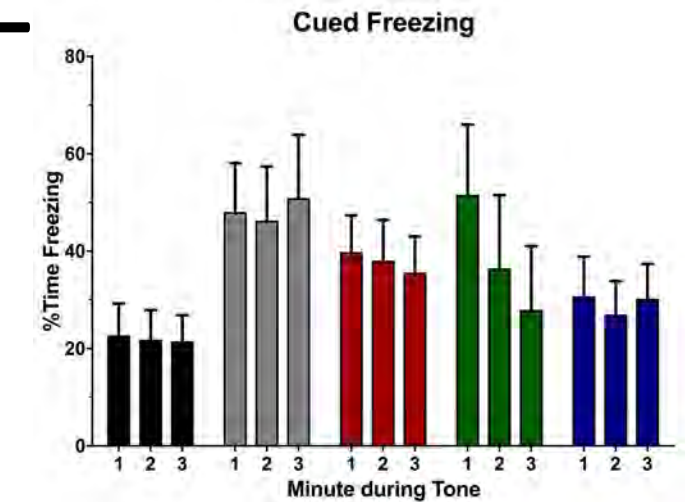



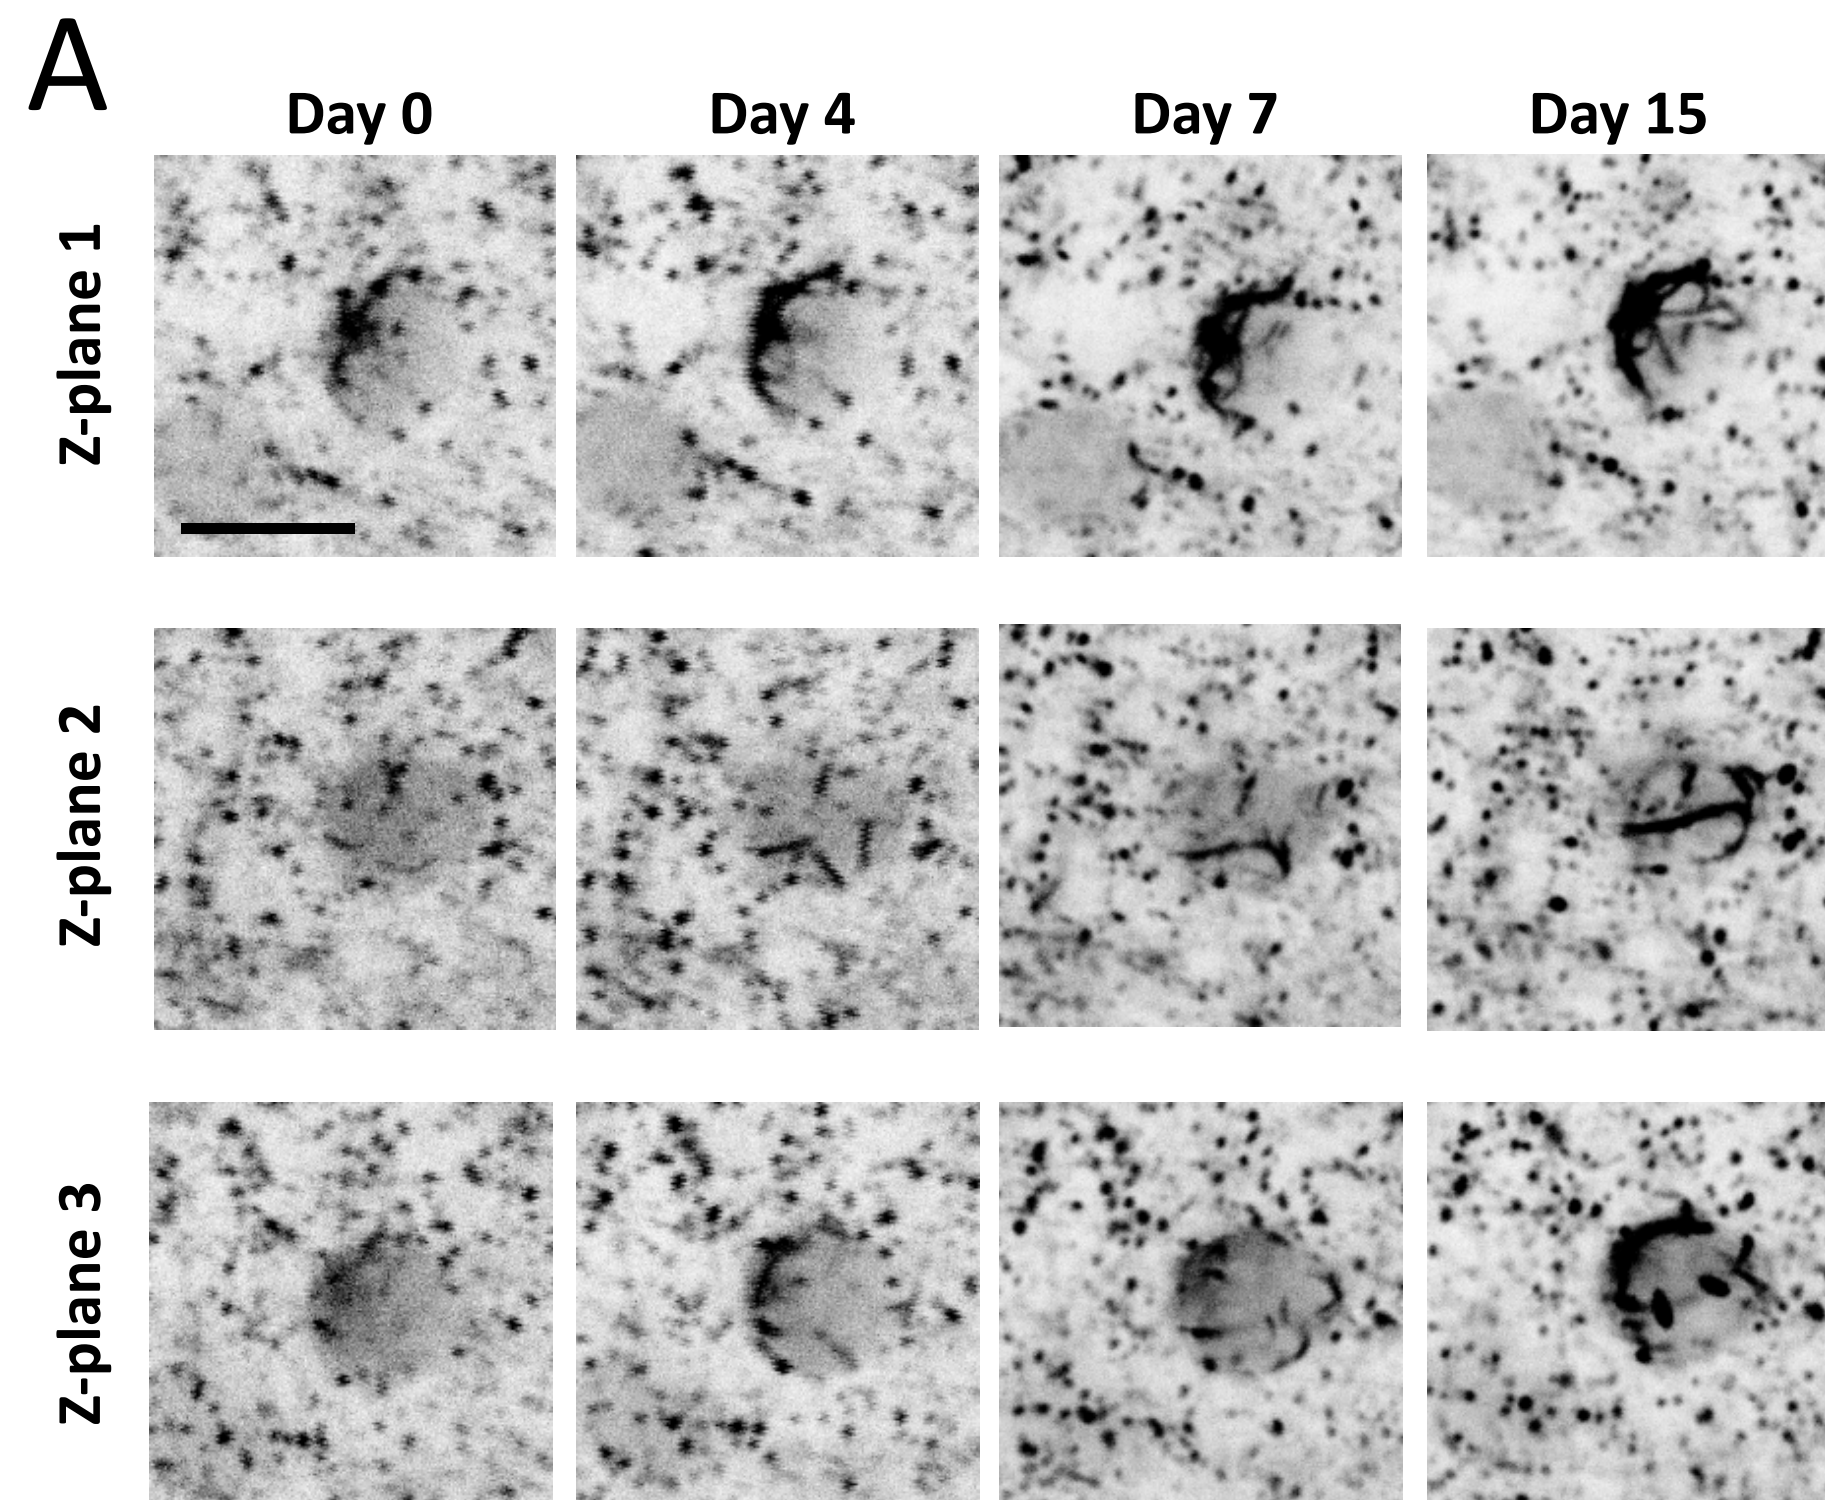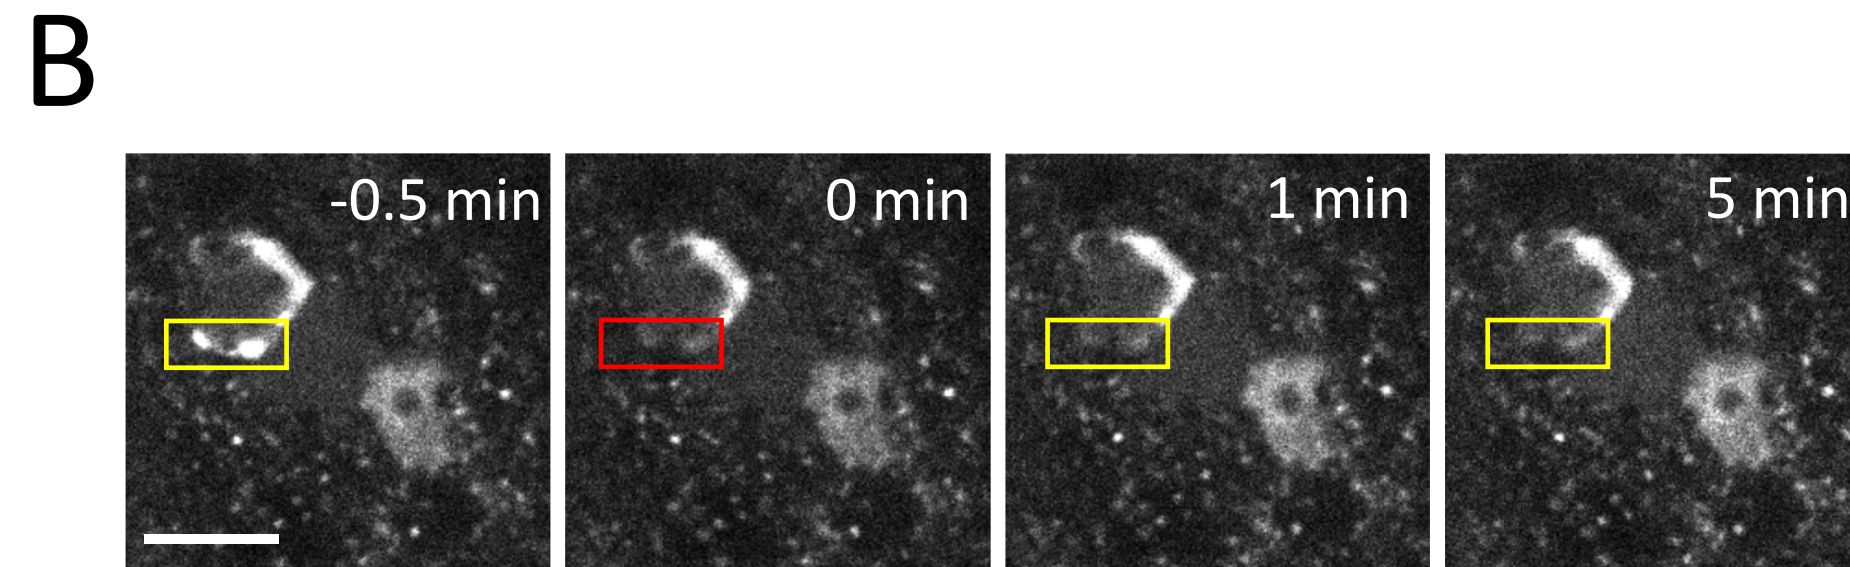

**Inclusion immobile fraction  
by FRAP**

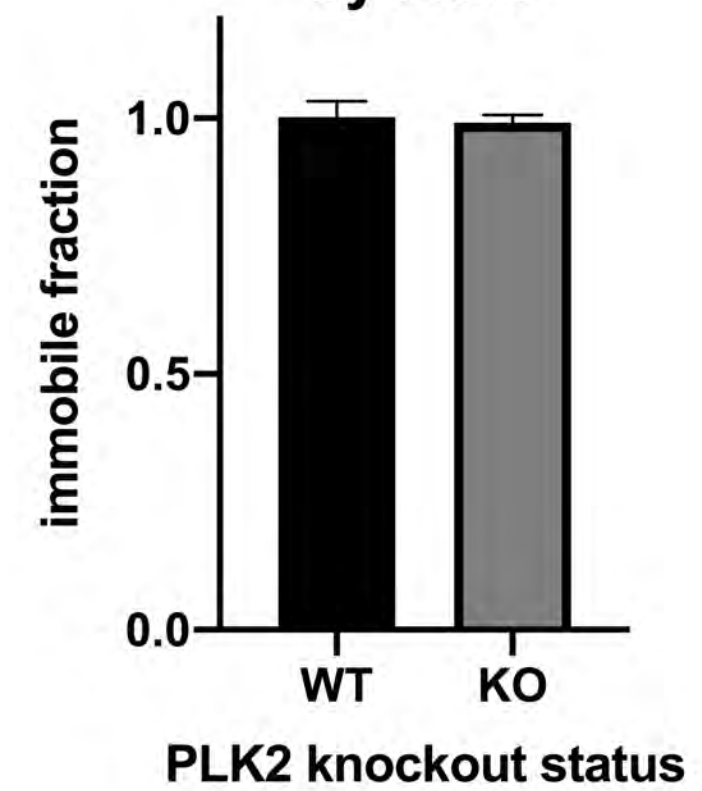

### Survival of Lewy inclusion-bearing neurons

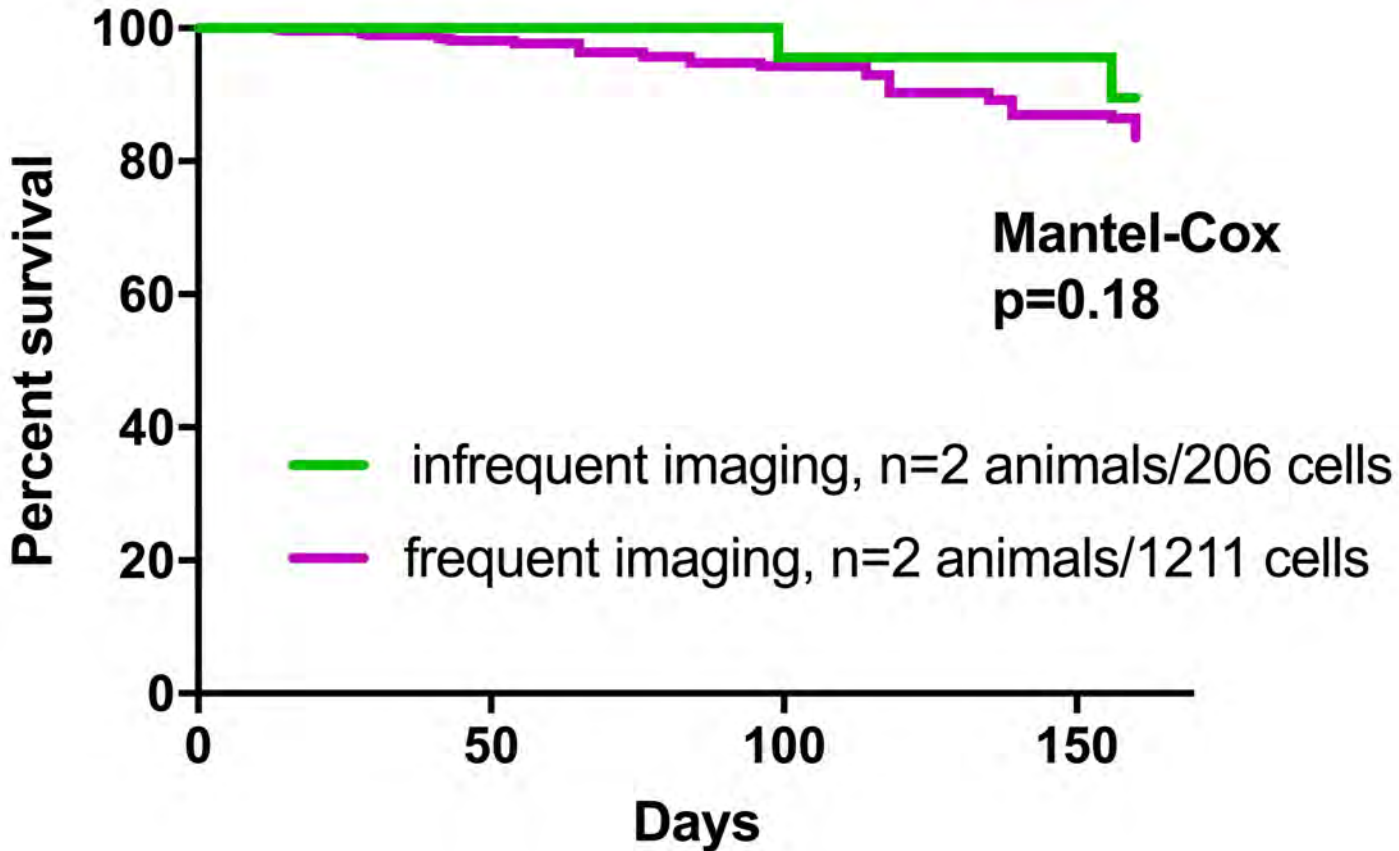

Supplement: mmc1.pdf [file mmc1.pdf]
